# Supplementary material for: Revealing local structural properties of an atomically thin MoSe2 surface using optical microscopy
Source: publisher site journal article supplement (doi:10.3762/bjnano.13.49), 2022-07-01
Supplement: Additional file 1 [file 2190-4286-13-49-S1.pdf]

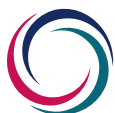

## Supporting Information

for

### **Revealing local structural properties of an atomically thin MoSe<sub>2</sub> surface using optical microscopy**

Lin Pan, Peng Miao, Anke Horneber, Alfred J. Meixner, Pierre-Michel Adam  
and Dai Zhang

*Beilstein J. Nanotechnol.* **2022**, *13*, 572–581. [doi:10.3762/bjnano.13.49](https://doi.org/10.3762/bjnano.13.49)

## Additional experimental data

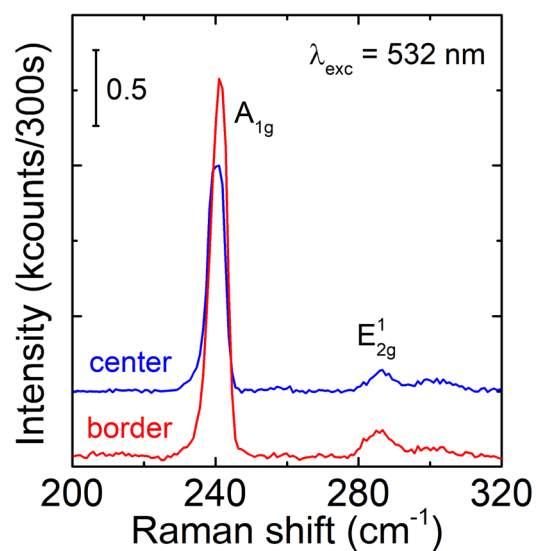

**Figure S1:** Raman spectra obtained from the border and center regions of a MoSe<sub>2</sub> flake with a 532 nm laser as the excitation source.

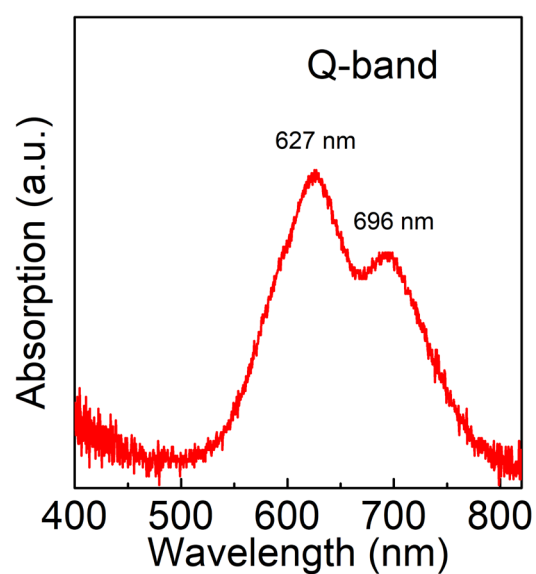

**Figure S2:** Absorption spectrum of a CuPc film with a thickness of 10 nm on a glass substrate. Two absorption peaks are located at 627 and 696 nm, which belong to the Q-band absorption of CuPc.

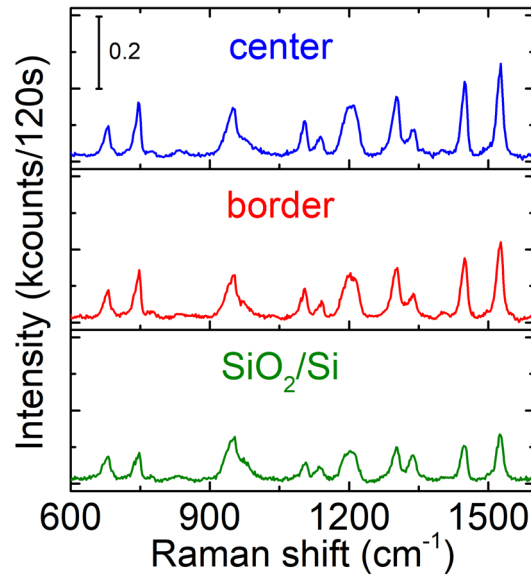

**Figure S3:** Raman spectra measured from CuPc/MoSe<sub>2</sub> using a radially polarized beam.

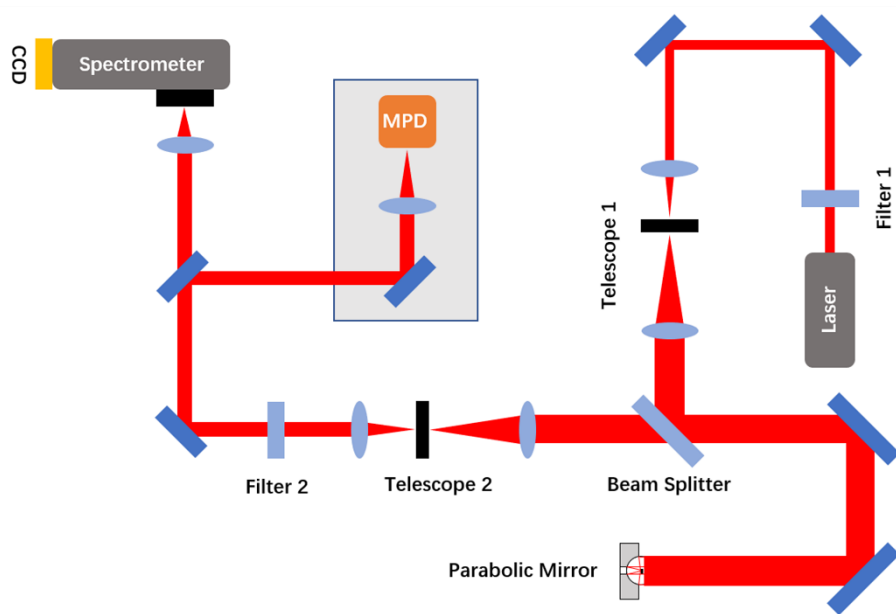

**Figure S4:** Schematic diagram of the custom-built confocal optical microscope with a parabolic mirror for light focusing and emission detection. Either a 636 nm (532 nm) CW laser or a 780 nm femtosecond pulsed laser are coupled to the microscope.
